# Supplementary material
Source: PubMed Central journal article supplement (PMC5776999)
Supplement: pnas.201717806SI.pdf [file pnas.201717806SI.pdf]

# Supporting Information

Grybchuk et al. 10.1073/pnas.1717806115

## SI Methods

**Cultivation of Trypanosomatids.** Axenic cultures of monoxenous trypanosomatids of the genera *Leptomonas*, *Crithidia*, and *Phytomonas* were obtained from (i) Life Science Research Centre, University of Ostrava, Ostrava, Czech Republic; (ii) Department of Parasitology, Charles University, Prague; (iii) Institute of Parasitology, Budweis, Czech Republic; (iv) Fundação Oswaldo Cruz, Rio de Janeiro; and (v) the Zoological Institute of the Russian Academy of Sciences, St. Petersburg, Russia. Trypanosomatids were cultivated in the Brain Heart infusion medium supplemented with 10  $\mu\text{g}/\text{mL}$  of hemin, 500 units/mL of penicillin, and 0.5 mg/mL of streptomycin as described previously (105) and grown to the late logarithmic stage ( $10^7$ – $10^8$  cells/mL).

**Phylogenetic Analyses of Viruses.** RDRP sequences of the viruses characterized in this work were aligned with the related sequences from GenBank in the online version of MAFFT 7 using the E-INS-i method (106). Ambiguous parts of the alignments were removed with the use of TrimAl v. 1.3 (107). Positions with more than 50% gaps were filtered out by Gap Strip/Squeeze V. 2.1.0 (<https://www.hiv.lanl.gov/content/sequence/GAPSTREEZE/gap.html>). The resulting alignments had the following lengths: 412 aa (the *Narnaviridae* dataset), 273 aa (the *Tombus-/Nodaviridae* dataset), and 1,415 aa (the *Bunyaviridae* dataset).

Maximum likelihood phylogenetic inference was performed in IQ-TREE v. 1.4.2 (108) with automatic selection of the best-fit amino acid substitution and site heterogeneity models (four gamma categories). The best-fitted model parameters defined by Bayesian Information Criterion were LG + F + I + G for the *Narnaviridae* and *Bunyaviridae* datasets and Blosum62 + I + G4 for the *Tombus-/Nodaviridae* dataset. Gaps were treated as missing data. Edge support was estimated with a bootstrap test (1,000 standard replicates). Bayesian inference was accomplished in MrBayes 3.2.6 (109) with the analyses ran for 1 million generations (given the observed fast convergence) and trees sampled every 100 generations. The mixed amino acid substitution model was used (resulting in 1.0 posterior probability of Blosum62 for all three datasets) with the heterogeneity over sites estimated using the G + I model. Amino acid frequencies were fixed to empirical values in the *Narnaviridae* and *Bunyaviridae* datasets and were estimated from the data matrix in the *Tombus-/Nodaviridae* dataset in accordance with the best-fit model defined by IQ-TREE v. 1.4.2 for each dataset. Other parameters were left in their default states.

**Phylogeny of Trypanosomatid Hosts.** The core alignments of 18S rRNA and gGAPDH genes were taken from previous work (76). Ambiguously aligned positions of 18S rRNA gene alignment were removed using Gblocks 0.91b as described previously (110). The concatenated alignments were subjected to maximum likelihood analysis in IQ-TREE (108) with partitioning by gene as well as by codon position for the gGAPDH gene. The best partitioned model of nucleotide substitutions (K3Pu + G4, TIM3 + I + G4, and TPM2u + G4 for the first, second, and third codon positions of gGAPDH gene, respectively and TNe + I + G4 for 18S rRNA gene) was selected with the use of ModelFinder (111). The statistical support of branches was estimated using 1,000 replicates of the standard bootstrap method.

**Genomic and Transcriptomic Analyses.** To find trypanosomatid signature sequences in the Sequence Reads Archive (SRA, <https://www.ncbi.nlm.nih.gov/sra>) and transcriptome shotgun assemblies (TSAs), TBLASTN and BLASTN searches were performed with amino acid (PFR1) and nucleotide (18S rRNA) sequences, respectively. In case of SRA-blast, the retrieved reads were assembled into contigs using the CAP3 sequence assembly program with the following parameters: minimal overlap length, 20 bp; minimum identity, 100% (112). Obtained contigs were extended by successive rounds of BLASTN searches against the original SRA. Final full-length contigs as well as hits from TSAs were subjected to blast search (megablast for nucleotide sequences and blastp for translated protein-coding sequences) against the nonredundant nucleotide collection of the NCBI database for identification. A similar approach was used to search of reads corresponding to nucleocapsid proteins in SRAs, which contained RDRPs closely related to LBVs. Obtained amino acid sequences were aligned with newly identified nucleocapsid proteins of viruses characterized in this work using BLAST pairwise alignment to confirm their identities.

**Codon Usage Analysis in *Leptomonas pyrrocoris* Viruses.** Codon frequencies in the protein-coding regions of the six viral genes were analyzed using the CODONW program ([codonw.sourceforge.net](http://codonw.sourceforge.net)).

**Negative-Stain Transmission Electron Microscopy.** In brief, gradient-purified virus samples were applied to a carbon-coated copper grid, stained with molybdenum acetate, and examined under a Philips 201C transmission electron microscope. The morphologies and sizes of the virus particles were analyzed as described previously (113).

A

## LpyrH10\_02 scaffold NW\_015438358.1

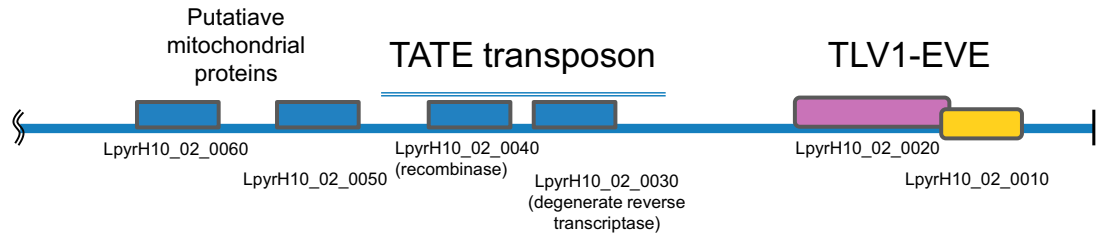

B

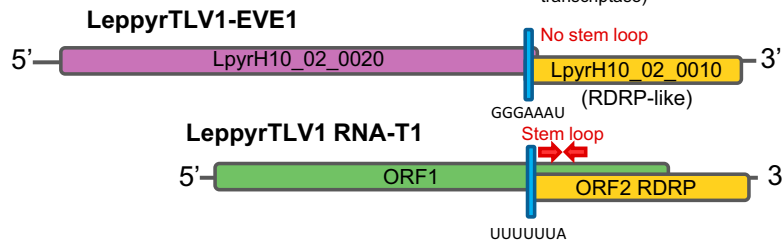

C

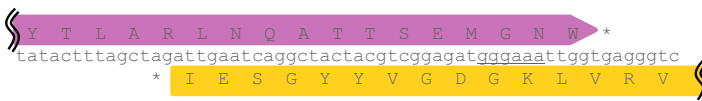

D

| MOTIFS                         | F <sub>1</sub>                                                                                                                                                                    | F <sub>2</sub> | A |
|--------------------------------|-----------------------------------------------------------------------------------------------------------------------------------------------------------------------------------|----------------|---|
| <u>Picorna</u>                 |                                                                                                                                                                                   |                |   |
| 1RDR_A_Poliiovirus             | (155) VTYV <b>KDE</b> LRS (164) (169) EQGKS <b>RLI</b> EASSLND (183) (228) -- <b>KLFAFDYTG</b> YDASLSP (243)                                                                      |                |   |
| P03313.4_coxsackie_virus_B3    | (156) VTYV <b>KDE</b> LRS (165) (170) ARGKS <b>RLI</b> EASSLND (184) (230) -- <b>HLIAFDYSG</b> YDASLSP (244)                                                                      |                |   |
| AFK65743.1_Rhinovirus_C        | (139) ITYL <b>KDE</b> LRS (148) (153) KVGKT <b>RAI</b> EASSLND (167) (213) -- <b>NLLVFDYTN</b> YDGS LNP (227)                                                                     |                |   |
| P03305.1_foot-and-mouth_diseas | (160) QTFL <b>KDE</b> IRP (169) (174) RAGKT <b>RI</b> VDVLPVEH (188) (233) YRNVWDV <b>DYSA</b> FDANHCS (250)                                                                      |                |   |
| <u>Flavi</u>                   |                                                                                                                                                                                   |                |   |
| P06935.2_west_nile_virus       | (455) NMMG <b>KRE</b> KKP (464) (469) KAKGS <b>RAI</b> WFMWLG (483) (529) GGVYAD <b>D</b> TAG <b>WD</b> TRITK (546)                                                               |                |   |
| P17763.2_dengue_virus          | (452) NMMG <b>KRE</b> KKL (461) (466) KAKGS <b>RAI</b> WYMWLG (480) (526) GGNMYAD <b>D</b> TAG <b>WD</b> TRITE (543)                                                              |                |   |
| P19711.2_bovine_viral_diarrhea | (259) TAlP <b>KNE</b> KRD (268) (280) VEKRP <b>RV</b> IQYPEAKT (294) (338) EPVAVSF <b>D</b> TKA <b>WD</b> TQVTS (355)                                                             |                |   |
| <u>Calici</u>                  |                                                                                                                                                                                   |                |   |
| Q83883.1_Norwalk_virus         | (143) TAAL <b>KDE</b> LVK (152) (158) QKVK <b>RLL</b> WGADLGT (172) (216) YKNHFD <b>A</b> DY <b>TAW</b> DSTQNR (233)                                                              |                |   |
| P27410.1_Rabbit_hemorrhagic_di | (142) ACGL <b>KDE</b> LRP (151) (156) KEGK <b>RLL</b> WGCDVGV (170) (216) ASDFLCL <b>DY</b> SK <b>WD</b> STMSP (233)                                                              |                |   |
| Q6XDK8.1_Sapporo_virus         | (315) KLAL <b>KDE</b> LRP (324) (329) AQGK <b>RLL</b> WGCDAGA (343) (387) GGVLYCL <b>DY</b> SK <b>WD</b> STQHP (404)                                                              |                |   |
| <u>LeppyrTLV1-EVE1</u>         | (158) - <b>SFI</b> <b>KDE</b> GYD (166) (167) <b>EYKMP</b> <b>RAI</b> NSYSDST (181) (221) <b>DSK</b> VLYT <b>D</b> FSH <b>FE</b> SHHRG (238)                                      |                |   |
| <u>LeppyrTLV1</u>              | (157) <b>DSFI</b> <b>KDE</b> SYD (166) (167) <b>ELKAP</b> <b>RSI</b> MSYPDDV (181) (221) <b>GKVG</b> ST <b>D</b> FS <b>S</b> Y <b>E</b> CHHSG (238)                               |                |   |
| MOTIFS                         | B                                                                                                                                                                                 | C              | D |
| <u>Picorna</u>                 |                                                                                                                                                                                   |                |   |
| 1RDR_A_Poliiovirus             | (286) <b>MP</b> <b>SG</b> CSG <b>T</b> SIF <b>NS</b> MINNLI (305) (322) <b>K</b> MIAY <b>GDD</b> VIASYP (335) (348) <b>K</b> DYGLTM--- <b>T</b> (355)                             |                |   |
| P03313.4_coxsackie_virus_B3    | (288) <b>MP</b> <b>SG</b> CSG <b>T</b> SIF <b>NS</b> MINNIII (307) (324) <b>R</b> MIAY <b>GDD</b> VIASYP (337) (350) <b>K</b> DYGLTM--- <b>T</b> (357)                            |                |   |
| AFK65743.1_Rhinovirus_C        | (268) <b>MP</b> <b>SG</b> ISG <b>T</b> SIF <b>NT</b> IINNIII (287) (304) <b>K</b> IVAY <b>GDD</b> VIASYP (317) (330) <b>V</b> KYGLTI--- <b>T</b> (337)                            |                |   |
| P03305.1_foot-and-mouth_diseas | (296) <b>MP</b> <b>SG</b> CSA <b>T</b> SII <b>NT</b> ILNNIYV (315) (332) <b>T</b> MSI <b>Y</b> <b>GDD</b> IVVASD (345) (358) <b>K</b> SLGQTI--- <b>T</b> (365)                    |                |   |
| <u>Flavi</u>                   |                                                                                                                                                                                   |                |   |
| P06935.2_west_nile_virus       | (602) <b>RG</b> <b>SG</b> QVV <b>T</b> YAL <b>NT</b> FTNLAVQ (621) (662) <b>R</b> MAVS <b>GDD</b> CVVKP- (674) (687) <b>N</b> AMSKVRKDIQ (697)                                    |                |   |
| P17763.2_dengue_virus          | (598) <b>RG</b> <b>SG</b> QVG <b>T</b> YGL <b>NT</b> FTNMEAQ (617) (656) <b>R</b> MAIS <b>GDD</b> CVVKP- (668) (681) <b>N</b> DMGKVRKDIP (691)                                    |                |   |
| P19711.2_bovine_viral_diarrhea | (403) <b>RG</b> <b>SG</b> QPD <b>T</b> SAG <b>NS</b> MLNVLTM (422) (442) <b>R</b> IHV <b>C</b> <b>GDD</b> GFLLITE (455) (471) <b>H</b> EAGK <b>PQK</b> -IT (480)                  |                |   |
| <u>Calici</u>                  |                                                                                                                                                                                   |                |   |
| Q83883.1_Norwalk_virus         | (279) <b>LP</b> <b>SG</b> FP <b>C</b> T <b>S</b> QV <b>NS</b> INHWIIT (298) (318) <b>Y</b> FSFY <b>GDD</b> EIVSTD (331) (344) <b>K</b> EYGL <b>KP</b> --- <b>T</b> (351)          |                |   |
| P27410.1_Rabbit_hemorrhagic_di | (279) <b>LP</b> <b>SG</b> MP <b>F</b> T <b>S</b> V <b>NS</b> ICHWLLW (298) (321) <b>P</b> FYTY <b>GDD</b> GVYAMT (334) (349) <b>R</b> DYGL <b>S</b> P--- <b>T</b> (356)           |                |   |
| Q6XDK8.1_Sapporo_virus         | (450) <b>LP</b> <b>SG</b> MP <b>F</b> T <b>S</b> V <b>NS</b> LNHMTYF (469) (493) <b>T</b> VHTY <b>GDD</b> CLYSVC (506) (521) <b>T</b> SFGL <b>KP</b> --- <b>T</b> (528)           |                |   |
| <u>LeppyrTLV1-EVE1</u>         | (284) <b>LM</b> <b>SG</b> AL <b>WT</b> S <b>FQ</b> <b>NS</b> FLNFFVM (303) (323) <b>K</b> MFIE <b>GDD</b> GIMKHF (336) (344) <b>K</b> RLGL <b>CL</b> K <b>L</b> -IN (353)         |                |   |
| <u>LeppyrTLV1</u>              | (288) <b>LM</b> <b>SG</b> AL <b>WT</b> S <b>FQ</b> <b>NS</b> FLNMMI (307) (325) <b>D</b> TFIE <b>GDD</b> GIFRAF (338) (346) <b>A</b> RLG <b>L</b> K <b>L</b> K <b>L</b> -IS (355) |                |   |

Fig. S1. LeppyrTLV1 EVE1. (A) The endogenous viral element is located at the subtelomeric region of the *Leptomonas pyrrochoris* chromosome (scaffold NW\_015438358.1). The EVE1 element is preceded by the reverse transcriptase-coding TATE DNA transposon indicating the possible mechanism for the LeppyrTLV1 endogenization. (B) Comparison of the ORF organization of RDRP-coding RNA-T1 of 1 LeppyrTLV1 and its endogenous viral element. (C) The overlap region between the ORFs of EVE1 contains a putative slippery sequence (underlined) capable of driving a  $-1$  ribosomal frameshift, similarly to LeppyrTLV1. (D) Multiple alignments of RDRPs of LeppyrTLV1 and LeppyrTLV1-EVE1 with RNA polymerases of *Picorna*-, *Flavi*-, and *Caliciviridae*. Identical residues are indicated in red; similar residues are in blue. Each block shows amino acid motifs typically found in viral RNA polymerases (59).

**A**

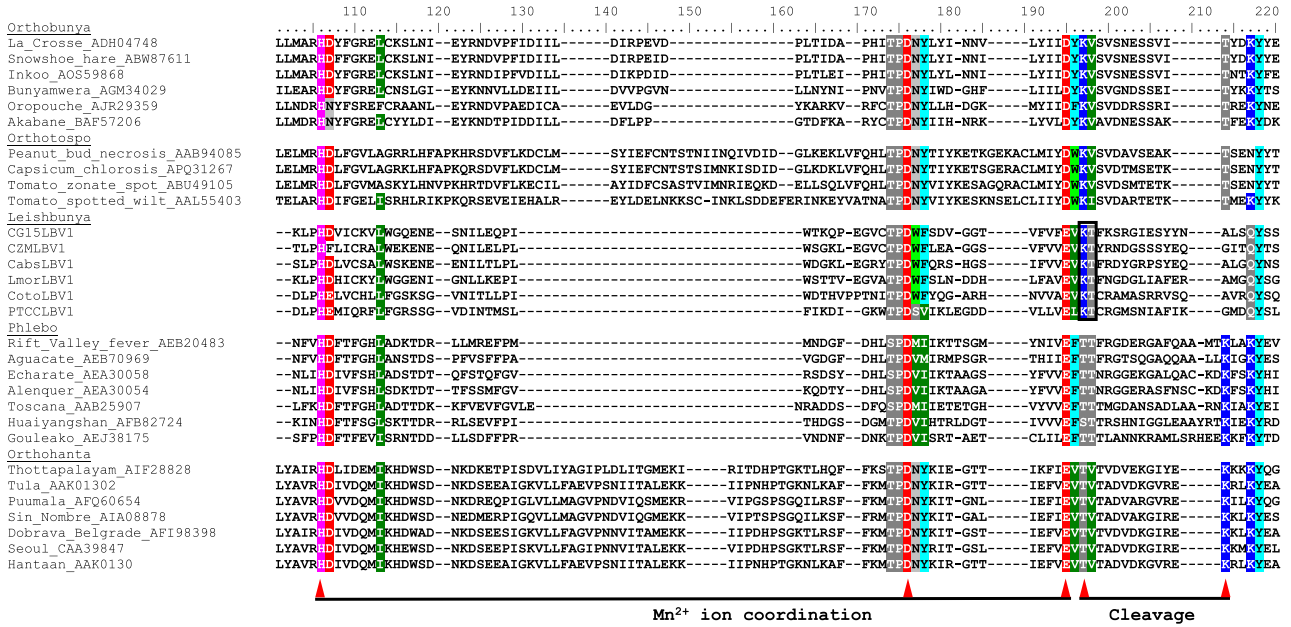

**B**

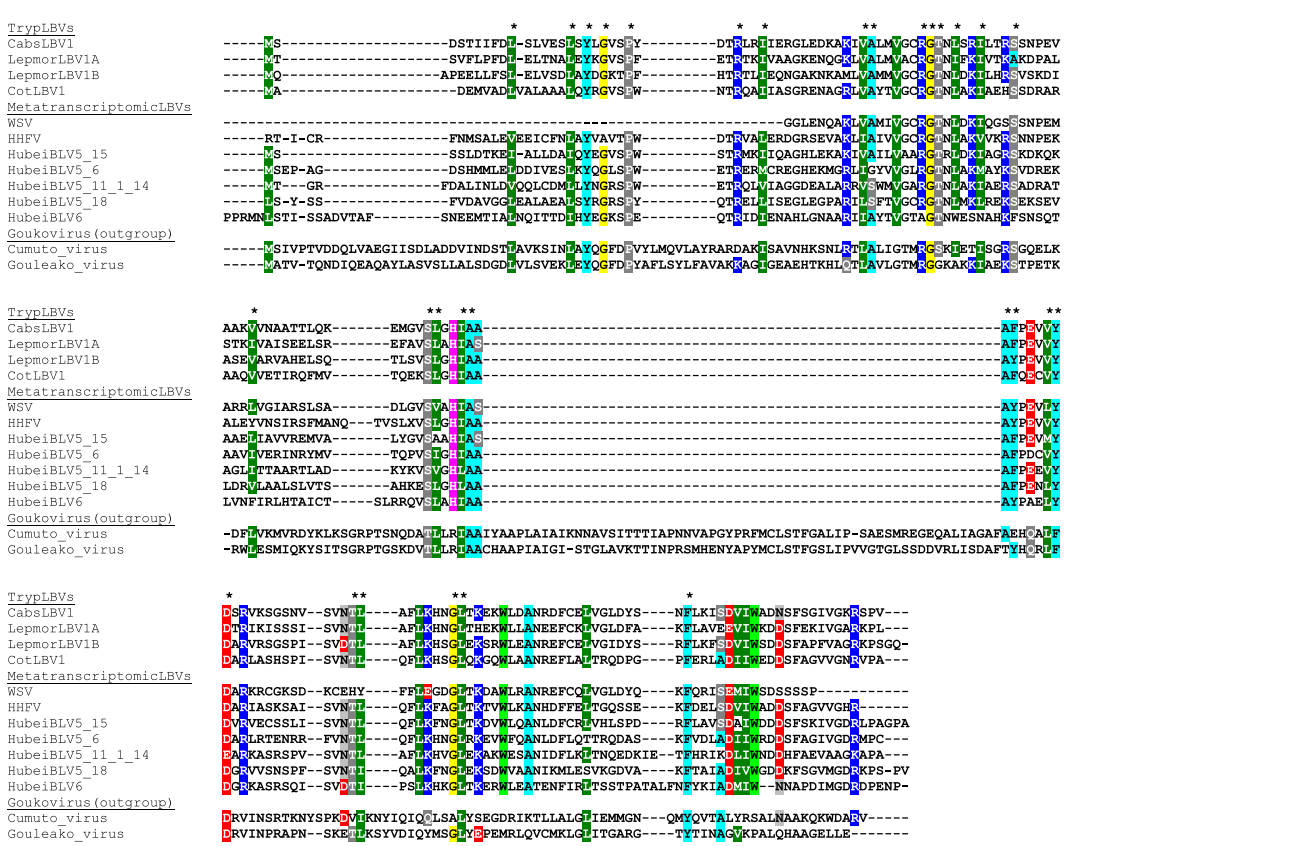

**Fig. S2.** Leishbunyavirus protein domains. (A) Amino acid alignment of the N-terminal endonuclease domain of the L protein of leishbunyaviruses and other bunyaviruses. Functionally important residues are marked with arrowheads. Residues implicated in nucleolytic cleavage in leishbunyaviruses are boxed. (B) Amino acid alignment of nucleocapsid proteins of leishbunyaviruses reported in ref. 34 and this work (TrypLBVs) and assembled from metatranscriptomes (metatranscriptomic BVs). *Cumuto* and *Gouleako* viruses are shown for comparison. Indels are shown as dashes. Positions with more than 82% similarity are shaded; those with 90% similarity are starred.





















Table S4. Metatranscriptomic contigs assembled from SRA depositions

| Name of contig               | Sequence                                                                                                                                                                                                                                                                                                                                                                                                                                                                                                                                         | Identity                                                                                         | SRA accession | Name of virus found in the SRA                 | SRA name                                                   | Biomaterial included in the sample                                                                                             | Ref. to the SRA    |
|------------------------------|--------------------------------------------------------------------------------------------------------------------------------------------------------------------------------------------------------------------------------------------------------------------------------------------------------------------------------------------------------------------------------------------------------------------------------------------------------------------------------------------------------------------------------------------------|--------------------------------------------------------------------------------------------------|---------------|------------------------------------------------|------------------------------------------------------------|--------------------------------------------------------------------------------------------------------------------------------|--------------------|
| SRX1712638_HBLV6_PFR         | GATTGGAAAGCTGGAGAAAGATTGAGGATGAGCTGGCGGCTCAGCTAGACGCGG-<br>ACGGAATGGCAGACAGCGCCAGTGAATGTGCTCAAGAACCTCGAG<br>CCATGGCAGATCAGGTAATCTGCGCAAAATTTGGGGTTTCGCAACATTT-<br>GGATAAATTGGCGAAACCCAAAGTAAATACATGAACCAACCAAGCGTTCTCCG-<br>CCAGGGGCTGGGCAACCGTACGTCTAGTGAACGCTTGGAA TGAATGA-<br>CAITAAAACCAATCCCTTACCTGGCAGTAAACACCCAGAAAGTGTGACTCAAT-<br>CAITCCGTGGAAAGCCGGATTTCCGGGCTTTTGGAGAACAACTGCCCTAT-<br>CAGCTAGTGTAGTGTAGTGTAGTGTAGTGTAGTGTAGTGTAGTGTAGTGTAG-<br>TTAGGTTTCGATTCCGGAGAGGAGGAGGAGGAGGAGGAGGAGGAGGAGGAGG-<br>GGG                          | <i>Trypanosoma parafagellar</i><br>rod protein 2<br><i>Herpetomonas</i> sp. 185<br>ribosomal RNA | SRX1712638    | Hubei bunya-like<br>virus 6 (HBLV6)            | Leech mix Hubei                                            | <i>Whitmania pigra</i> (horse leech)                                                                                           | Shi (2016) (1)     |
| SRX833697_WSV_185            | CCATGGCAGATCAGGTAATCTGCGCAAAATTTGGGGTTTCGCAACATTT-<br>GGATAAATTGGCGAAACCCAAAGTAAATACATGAACCAACCAAGCGTTCTCCG-<br>CCAGGGGCTGGGCAACCGTACGTCTAGTGAACGCTTGGAA TGAATGA-<br>CAITAAAACCAATCCCTTACCTGGCAGTAAACACCCAGAAAGTGTGACTCAAT-<br>CAITCCGTGGAAAGCCGGATTTCCGGGCTTTTGGAGAACAACTGCCCTAT-<br>CAGCTAGTGTAGTGTAGTGTAGTGTAGTGTAGTGTAGTGTAGTGTAGTGTAG-<br>TTAGGTTTCGATTCCGGAGAGGAGGAGGAGGAGGAGGAGGAGGAGGAGGAGG-<br>GGG                                                                                                                                      | <i>Trypanosoma parafagellar</i><br>rod protein 2<br><i>Herpetomonas</i> sp. 185<br>ribosomal RNA | SRX833697     | <i>Wuhan spader</i><br>virus (WSV)             | Spiders                                                    | <i>Neoscona, Parasteatoda,</i><br><i>Plexippus, Pirata, Araneae</i> spp.                                                       | Li (2015) (2)      |
| SRX1711976_HBLV5_185         | ATCAGCTCGTGTGGCGTGTAGTGTAGTGTAGTGTAGTGTAGTGTAGTGTAG-<br>TTAGGTTTCGATTCCGGAGAGGAGGAGGAGGAGGAGGAGGAGGAGGAGGAG-<br>GGG                                                                                                                                                                                                                                                                                                                                                                                                                              | Strigomonadinae 185<br>ribosomal RNA                                                             | SRX1711976    | Hubei bunya-like<br>virus 5 (HBLV5)            | Diptera mix Hubei                                          | <i>Drosophila, Episyphus, Sarcophaga,</i><br><i>Muscina, Plecticus</i>                                                         | Shi (2016) (1)     |
| SRX833692_HHFV_185           | CCGGCTCTTTTTCAGCAACAACTGCCCTATCAGCTAGTGTAGTGTAGTGTAG-<br>CTGCCATGGCTTTCAGCGGAGCGGGGATTAAGGTTCCGATTCGGGAGGGAG-<br>CCTGAGAAATAGCTACACTTCTACGGAGGCGCAGCAGCGGGCGAAA TTTGCCA-<br>ATGTCAAAAGAAAACGATGAGGCAAGCAAGAAAATAGGTTTGT                                                                                                                                                                                                                                                                                                                          | Strigomonadinae 185<br>ribosomal RNA                                                             | SRX833692     | <i>Huangshi humpbacked</i><br>fly virus (HHFV) | Insects mix 4 (insect<br>in the mountain)                  | <i>Psychoda, Velarifictorus, Crocothemis,</i><br>Phoridae spp., Lampyridae spp.,<br><i>Aphelinus, Hyalopterus, Aulacorthum</i> | Li (2015) (2)      |
| SRX2422212_ABV1_colonyA_185  | TGACAGTAAACCAATGCTTCTACTGGCAGTAAACCCAGACGTTGACTCAAT-<br>TCATTCGTCGAAAGCGGCTTTTCGCGGCTTTTTCAGCAACAACTGCC-<br>TATCAGCTGTGTGGCGTGTAGTGTAGTGTAGTGTAGTGTAGTGTAGTGTAG-<br>GGATTAGGTTTCGATTCCGGAGAGGAGGAGGAGGAGGAGGAGGAGGAGGAG-<br>GGAGGCGAGCGCGCAAAATGCCCAATGTCAAAACCAAAACCAACGATGAGGCGAG-<br>CGAAAAGAAATAGAGTTGTAGTGTAGTGTAGTGTAGTGTAGTGTAGTGTAG-<br>TTTAAAACCAATGCAAAATCTAGTAAACAAATGGAGCACAAAGTCTGTGCCAGCA-<br>CCCGGGTAAATTCAGCTCCAAAAGCGTATAT                                                                                                      | Leishmaniinae 185<br>ribosomal RNA                                                               | SRX2422225    | <i>Apis bunyavirus 1</i>                       | RNA-seq of <i>Apis mellifera</i><br>South Africa colony 11 | <i>Apis mellifera</i>                                                                                                          | Remnant (2017) (3) |
| SRX833692_HHFV_nuc           | GGAGGAGTCTCAGATCAATATGCTGCCCTTAGAGTTGAAGATTGTTT-<br>TAACCTAGCTTATGCTGTGCGCTTGGCACACACGCTGTGGCTTTAGAGA-<br>GAGATGGAAGGTCGAGGTTCCGAAAGTTAAGCACTGTTGGGCTGCAGG-<br>GGTACCAACCTGCGCAAGCTGTTAAAAGAGTAAATATCTGAAAAGGCCCT-<br>CGAATAGTGAATAGCATCCGCTCTTTCAATGGCCAAACAGACTGTCTCCCTGG-<br>GNNCTGCTCCTTGGACATATTCGCGCGCTTACCGGAGGATGCTACGAT-<br>GCAAGAAATCGTCCAAAGAGTGTCTCTCAACACCCCTCCAGTCTCTGAA-<br>AATTCAGAGGCTCAGCAAGGTTGCTGTGAAGGTTAATCAGGACTTCTTCG-<br>AACTCAGAGGCTCAGCAAGGTTGAGAAAGTTGATGAGCTGCTCCGATGTGATATGG-<br>GCAGACATAGCTTCGCTGGGCTGGTAGTCCAGG | LBV nucleocapsid                                                                                 | SRX833692     | <i>Huangshi humpbacked</i><br>fly virus (HHFV) | Insects mix 4 (insect<br>in the mountain)                  | <i>Psychoda, Velarifictorus, Crocothemis,</i><br>Phoridae spp., Lampyridae spp.,<br><i>Aphelinus, Hyalopterus, Aulacorthum</i> | Li (2015) (2)      |
| SRX833697_WSV_nuc            | GGGGATTGGAAATCAGGCAAACTGGTTGCGATGATCGTGGGTCAGGGGAA-<br>CCAAATCTTGAATCAAGGTTCTTCGAGCAATCCGGAGATGGCAGCTCGC-<br>CTTGTGGCATGGCGTGGCTGTCCAGCAGACCTGGGCGTCTCAGTGGCTCA-<br>CAITGCTTCTGTTATCCAGAGGTTTATGATGATCCAGGAAAGGTTCCGGCA-<br>AGTCAGATAGTGAACACTATTTCTTCTTGAAGGTCAGGCTCACCAG-<br>GATGCTTGGCTGAGGCAACAGGGAGTTCGCCAGCTGGTGGGCTTGACTA-<br>CCAGAAATTCAGCCAAATCTGAAATGATCTGGTGTGATGAGCTCATCGCC                                                                                                                                                          | LBV nucleocapsid                                                                                 | SRX833697     | <i>Wuhan spader virus</i> (WSV)                | Spiders                                                    | <i>Neoscona, Parasteatoda, Plexippus,</i><br><i>Pirata, Araneae</i> spp.                                                       | Li (2015) (2)      |
| SRX1711976_HBLV5_nuc_contig6 | ATGCTGAGCCAGCTGGAGATAGCCATGATGCTTGGCTTGCAGGATAGTTG-<br>AAAGCCTTAAAGTATCAGGGTTGATCCATGGGAAACGAGAGAGGATGTGC-<br>AGAGAAAGTCAAGAGAGAGAGGAGGCTTATGGCTATGTAGTGGATTGAG-<br>GGAAACGAACTTCTAAATGCGTATTAAGAGTGTGGATCGGAGAGAGGCTG-<br>CAGTATCGTGGAGAGAAATCAATAGGATATGTTAATCACTCAGCCTGTATCTAAT-<br>TGAAAACAGAAATTTGTGAATACGCTACAGTTCTTAAAGCAATGGTCTGC-<br>GGAAAGAGGTTTGGTTCAAGCTAATTTAGATTTCTTACAAAACCCAGAGGAA-<br>GATCTAGCAAGTTTGGATCTGGCAGATATTTGGAGAGATGATGATTT-<br>TGCTGGGATTTGGGAGATAGGATGCCTTGTAGTGCAGTTGTTAGAAACCTA-<br>TGAATTCAGTTATGGCG             | LBV nucleocapsid                                                                                 | SRX1711973    | Hubei bunya-like virus 5 (HBLV5)               | Diptera mix Hubei                                          | <i>Drosophila, Episyphus, Sarcophaga,</i><br><i>Muscina, Plecticus</i>                                                         | Shi (2016) (1)     |





**Table S5. Codon usage in LeppyrOV1 and LeppyrTLV1 ORFs**

| Sequence      | T3   | C3   | A3   | G3   | GC   |
|---------------|------|------|------|------|------|
| LeppyrOV1     |      |      |      |      |      |
| ORF1          | 0.40 | 0.30 | 0.18 | 0.31 | 0.51 |
| ORF2          | 0.35 | 0.32 | 0.19 | 0.33 | 0.53 |
| ORF3          | 0.39 | 0.28 | 0.20 | 0.34 | 0.52 |
| ORF4          | 0.33 | 0.34 | 0.17 | 0.34 | 0.55 |
| ORF5          | 0.39 | 0.27 | 0.15 | 0.33 | 0.57 |
| ORF6          | 0.45 | 0.27 | 0.16 | 0.32 | 0.48 |
| Average       | 0.38 | 0.30 | 0.18 | 0.33 | 0.53 |
| LeppyrTLV1    |      |      |      |      |      |
| ORF1          | 0.34 | 0.26 | 0.33 | 0.32 | 0.45 |
| ORF2          | 0.41 | 0.29 | 0.28 | 0.23 | 0.47 |
| ORF3          | 0.34 | 0.24 | 0.20 | 0.22 | 0.47 |
| Average       | 0.36 | 0.26 | 0.27 | 0.26 | 0.46 |
| Leppyr genome |      |      |      |      |      |
|               | 0.14 | 0.38 | 0.1  | 0.39 | 0.77 |

A3, C3, G3, and T3 are frequencies of the corresponding nucleotides in the third position; GC is the overall GC content.

**Table S6. Complementary terminal sequences (panhandles) of LBV1s and other Bunyavirales**

| Virus                                                         | 5'           | 3'           |
|---------------------------------------------------------------|--------------|--------------|
| <b>LBV1s</b>                                                  |              |              |
| <b>L segment</b>                                              |              |              |
| CG15LBV1                                                      | ACACAAAGAGAA | TGTTCTTTGTGT |
| LepmorLBV1b                                                   | ACACAAAGACAA | TATTCTTTGTGT |
| LepmorLBV1a                                                   | ACACAAAGATAA | ND           |
| CZMLBV1                                                       | ACACAAAGAGAA | TGTTCTTTGTGT |
| CotoLBV1                                                      | ACACAAAGACGA | TATTCTTTGTGT |
| PTCCLBV1                                                      | ACACAAAGAAGA | TATTCTTTGTGT |
| Consensus                                                     | ACACAAAGANAA | TRTTCTTTGTGT |
| <b>M segment</b>                                              |              |              |
| CabsLBV1-M                                                    | ACACAAAGAGAA | TGTTCTTTGTGT |
| CotoLBV1-M                                                    | ACTCAAAGACGA | ND           |
| LepmorLBV1a-M                                                 | ACACAAAGATAA | TATTCTTTGTG- |
| LepmorLBV1b-M                                                 | ACACAAAGACAA | ND           |
| consensus                                                     | ACWCAAAGABRA | TRTTCTTTGTGT |
| <b>S segment</b>                                              |              |              |
| CabsLBV1-S                                                    | ACACACGGAAAA | TATTCTTTGTGT |
| CotoLBV1-S                                                    | CACAACGACGA  | ND           |
| LepmorLBV1a-S                                                 | ACACATAGACAA | ND           |
| LepmorLBV1b-S                                                 | ACACACAGATAA | ND           |
| Consensus                                                     | ACACAHVGAHRA | TRTTCTTTGTGT |
| <b>Phenuiviridae</b>                                          |              |              |
| <b><i>Gouleako virus</i></b>                                  |              |              |
| L segment                                                     | ACACAAAGACAC | TGGACTTTGTGT |
| M segment                                                     | ACACAGTGACCC | GGGACTTTGTGT |
| S segment                                                     | ACACAGTGACCT | GGGACTTTGTGT |
| <b><i>Rift Valley fever virus</i></b>                         |              |              |
| L segment                                                     | ACACAAAGGCGC | CGGTCTTTGTGT |
| M segment                                                     | ACACAAAGACGG | CGGTCTTTGTGT |
| S segment                                                     | ACACAAAGACCC | GGAGCTTTGTGT |
| <b><i>Rice grassy stunt virus</i></b>                         |              |              |
| L segment                                                     | ACACAAAGTCCT | CAGACTTTGTGT |
| M segment                                                     | ACACAAAGTCCT | CAGACTTTGTGT |
| S segment                                                     | ACACAAAGTCCT | CAGACTTTGTGT |
| <b>Other Bunyavirales</b>                                     |              |              |
| <b><i>Hantaan orthohantavirus</i></b>                         |              |              |
| L segment                                                     | TAGTAGTAGACT | AGCATACTACTA |
| M segment                                                     | TAGTAGTAGACT | AGCATACTACTA |
| S segment                                                     | TAGTAGTAGACT | AGCATACTACTA |
| <b><i>Crimean-Congo hemorrhagic fever orthonairovirus</i></b> |              |              |
| L segment                                                     | TCTCAAAGATAT | ATTTCTTTGAGA |
| M segment                                                     | TCTCAAAGAAAT | ATTTCTTTGAGA |
| S segment                                                     | TCTCAAAGAAAC | ATTTCTTTGAGA |

Alignments of 5' and 3' terminal sequences L, M, and S segments of LBV1s and selected other Bunyavirales are shown. Nucleotides involved in bulge formation are underlined. ND, not determined.
